# Supplementary material for: Stability and reliability of perovskite containing solar cells and modules: degradation mechanisms and mitigation strategies
Source: Royal Society of Chemistry journal article supplement (doi:10.1039/d4ee01898b), 2024-01-01
Supplement: d4ee01898b1.pdf [file d4ee01898b1.pdf]

The detailed examination of the external quantum efficiencies (EQEs) for the perovskite top solar cell and the silicon bottom solar cell used for Figure 9 will be published by L. Brockmann (ISFH) in the near future. The evaluation of the spectral intensity for different air masses was conducted with SMARTS 2.9.2 (<https://www.nrel.gov/grid/solar-resource/smarts.html>) with the following input parameters:

|          |                                                                                                                                       |
|----------|---------------------------------------------------------------------------------------------------------------------------------------|
| Card 2   | 1 (Enter site pressure, altitude, and height (recommended))                                                                           |
| Card 2a  | 1013.25 0 0 (Site pressure (mB), Altitude (km), Height above ground (km))                                                             |
| Card 3   | 1 (Reference atmosphere)                                                                                                              |
| Card 3a  | 'USSA' (U.S. Standard Atmosphere 1976)                                                                                                |
| Card 4   | 1 (Water vapor: calculate from reference atmosphere and altitude)                                                                     |
| Card 4a  |                                                                                                                                       |
| Card 5   | 1 (Columnar Ozone Abundance: use default from reference atmosphere)                                                                   |
| Card 5a  |                                                                                                                                       |
| Card 6   | 1 (Gaseous Absorption: default from selected atmosphere)                                                                              |
| Card 6a  |                                                                                                                                       |
| Card 6b  |                                                                                                                                       |
| Card 7   | 370 (Carbon Dioxide Concentration (ppmv))                                                                                             |
| Card 7a  | 0 (Extraterrestrial Spectrum: Gueymard 2004)                                                                                          |
| Card 8   | 'S&F_RURAL' (Aerosol model: Rural)                                                                                                    |
| Card 8a  |                                                                                                                                       |
| Card 9   | 0 (Aerosol Optical Depth at 500 nm)                                                                                                   |
| Card 9a  | 0.084 (Atmospheric Turbidity)                                                                                                         |
| Card 10  | 41 (Albedo: Red construction brick)                                                                                                   |
| Card 10a |                                                                                                                                       |
| Card 10b | 1                                                                                                                                     |
| Card 10c | 51 37 180. (Fixed Tilt, 37 °, 180 ° Azimuth)                                                                                          |
| Card 10d |                                                                                                                                       |
| Card 11  | 280 4000 1.0 1366.1 (Spectral range 280 – 4000 nm, Solar constant distance correction 1.0, solar constant (1366.1 W/m <sup>2</sup> )) |
| Card 12  | 2                                                                                                                                     |
| Card 12a | 280 4000 0.5 (Spectral range 280 - 4000 nm in 0.5 nm steps)                                                                           |
| Card 12a | 3                                                                                                                                     |
| Card 12b | 8 12 43 (Global tilted irradiance, global tilted photon flux, global tilted photon flux per eV)                                       |
| Card 12c | 1 (Calculate Circumsolar Irradiance for specified Radiometer below)                                                                   |
| Card 13  | 0 2.9 0 (Slope, Aperature/Opening, Limit)                                                                                             |
| Card 13a | 0 (Smoothing Filter: Bypass)                                                                                                          |
| Card 14  |                                                                                                                                       |
| Card 14a | 0 (Illuminance: Bypass)                                                                                                               |
| Card 15  | 0 (UV: Bypass)                                                                                                                        |
| Card 16  | 2 (Input relative Air Mass)                                                                                                           |
| Card 17  | 1.0                                                                                                                                   |
| Card 17a | 1.1                                                                                                                                   |
| Card 17a | 1.2                                                                                                                                   |
| Card 17a | 1.3                                                                                                                                   |
| Card 17a | 1.4                                                                                                                                   |
| Card 17a | 1.5                                                                                                                                   |
| Card 17a | 1.6                                                                                                                                   |
| Card 17a | 1.7                                                                                                                                   |
| Card 17a | 1.8                                                                                                                                   |
| Card 17a | 1.9                                                                                                                                   |
| Card 17a | 2                                                                                                                                     |
| Card 17a | 3                                                                                                                                     |
| Card 17a | 4                                                                                                                                     |
| Card 17a | 5                                                                                                                                     |
| Card 17a | 7                                                                                                                                     |

|                      |    |
|----------------------|----|
| Card 17a<br>Card 17a | 10 |
|----------------------|----|

The evaluation of the short current density ratios is the integration of the EQEs with the spectral intensities conducted with python.
